# Supplementary material
Source: PubMed Central journal article supplement (PMC6246912)
Supplement: zii999092603s1.pdf [file zii999092603s1.pdf]

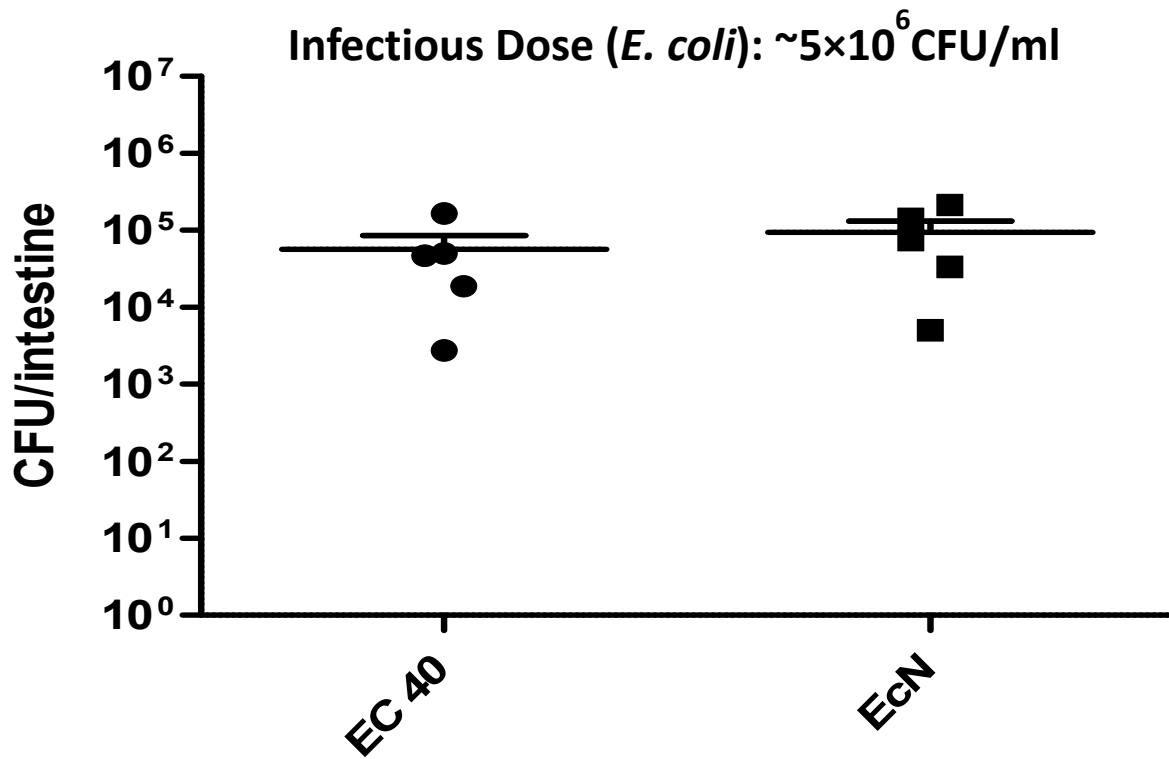

Figure S1: Colonization of *E. coli* strains in zebrafish intestine. Zebrafish were exposed to  $\sim 5 \times 10^6$  cfu/ml of either Ec 40 or EcN. After 6 h of inoculation and then 18 h of incubation, fish were sacrificed and intestinal *E. coli* (Ec 40 and Ec N) levels were determined by plating of serial dilutions of the intestinal homogenates.

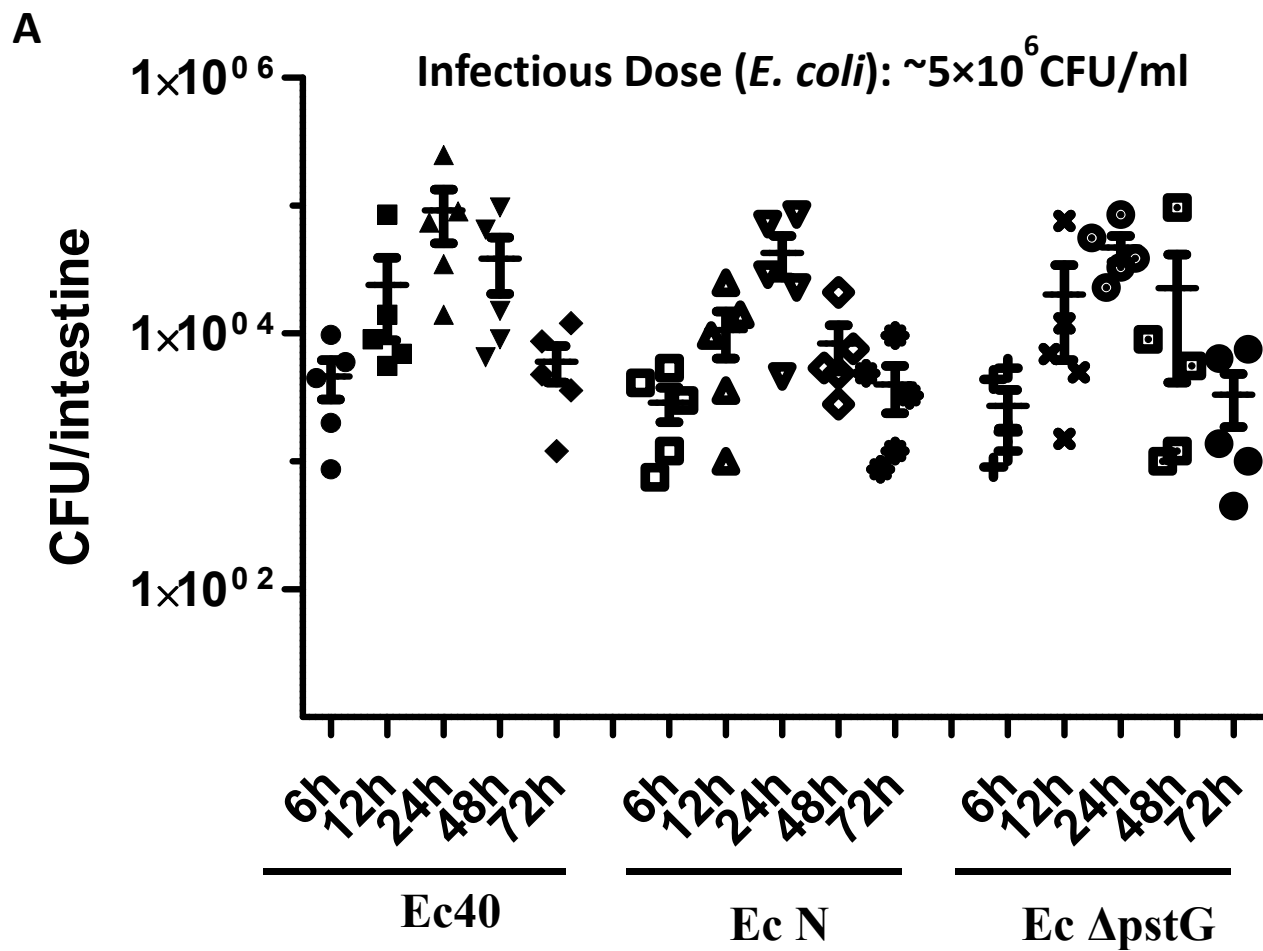

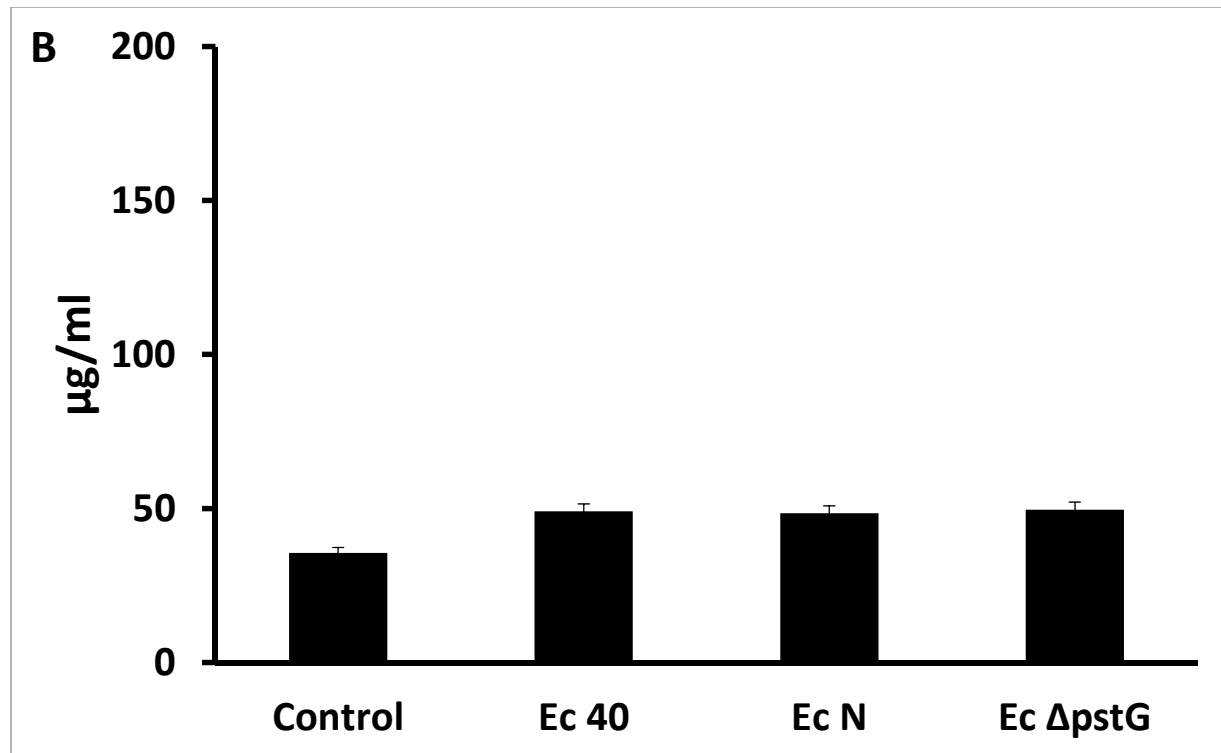

Figure S2: (A) Time dependent colonization of *E. coli* strains in zebrafish intestine. Zebrafish were inoculated with  $\sim 5 \times 10^6$  cfu/ml of Ec 40, Ec N or Ec  $\Delta$ ptsG for 6 h. After 6h, 12h, 24h, 48h and 72h of incubation fish were sacrificed and intestinal *E. coli* (Ec 40, Ec N and Ec  $\Delta$ ptsG) levels were determined by plating of serial dilutions of the intestinal homogenates. A significant level of colonization was observed up to 72 h, with the highest peak at 24 h. (B) Mucin level in excreted water from *E. coli* colonized fish. Fish were infected with three *E. coli* strains (Ec 40, Ec N and Ec  $\Delta$ ptsG) as indicated under the x axis. After 24 h of infection, mean values of mucin detected in water by modified PAS assay are indicated by the black bars above each infectious dose. The change of mucin level in excreted water is non-significant compare to the non-infected control group. Error bars indicate standard deviation

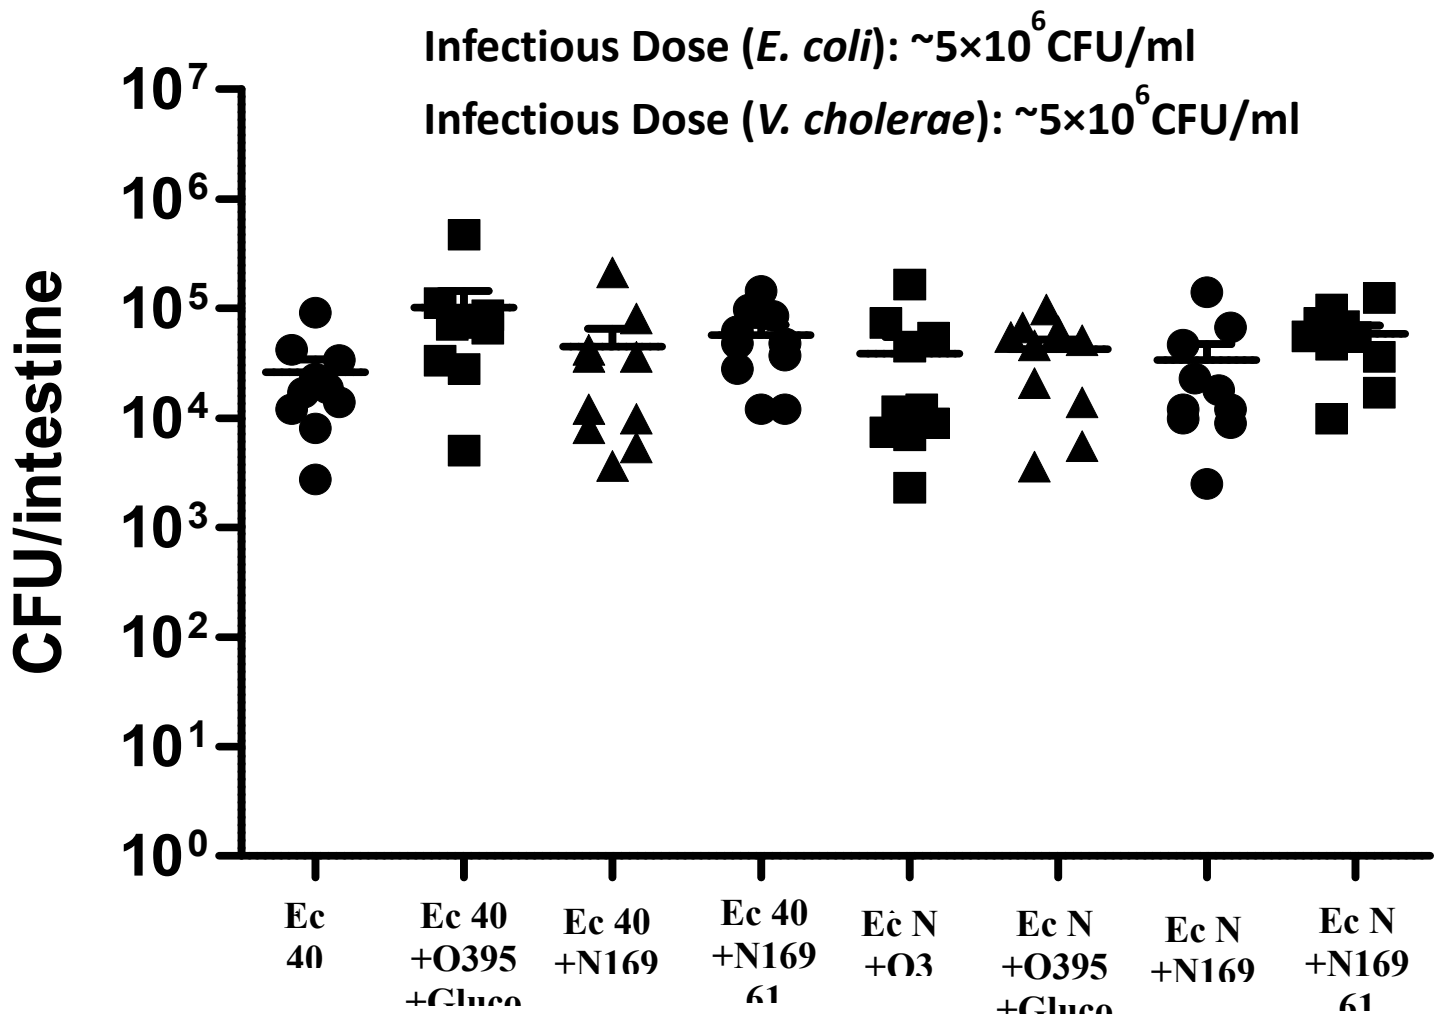

Figure S3: Colonization levels of *E. coli* strains in zebrafish intestine in the presence of glucose and *V. cholerae* infection. Zebrafish were fed 1% glucose for 12 h.  $\sim 5 \times 10^6$  cfu/ml of Ec 40 and Ec N were co-inoculated with  $\sim 5 \times 10^6$  cfu/ml of either *V. cholerae* O395 or N16961 for 6 h. After 18 h fish were sacrificed and intestinal *E. coli* (Ec 40 and Ec N) levels were determined by plating of serial dilutions of the intestinal homogenates.

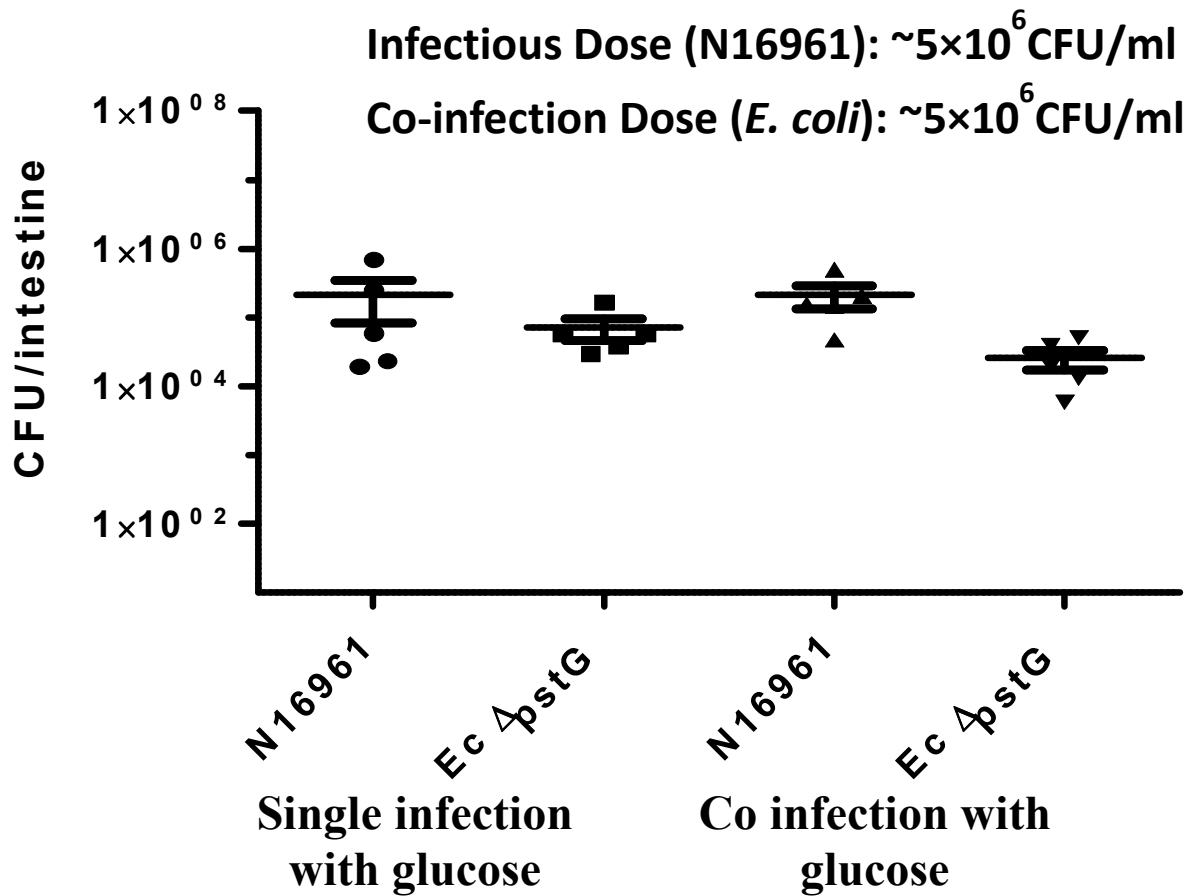

Figure S4: Effect of *E. coli* sugar transport mutant strain (*Ec ΔptsG*) plus glucose on *V. cholerae* colonization in zebrafish intestine. Zebrafish were fed 1% glucose for 12 h.  $\sim 5 \times 10^6$  cfu/ml of *Ec ΔptsG* and  $\sim 5 \times 10^6$  cfu/ml of *V. cholerae* N16961 were inoculated either for single infection or 1:1 co-infection as indicated below the X axis. *V. cholerae* and *E. coli* levels were determined by plating of serial dilutions of the intestinal homogenates. Horizontal bar indicates mean colonization level for each group and individual symbols indicate the results for individual fish. NS indicates non-significant difference.

**Table S1: List of strains & plasmids.**

| <b>Strains</b>                       | <b>Description</b>                                                                       | <b>Source/reference</b>                           |
|--------------------------------------|------------------------------------------------------------------------------------------|---------------------------------------------------|
| <b>Vc N16961</b>                     | <b>El Tor, Ogawa, Sm<sup>r</sup></b>                                                     | <b>Laboratory collection</b>                      |
| <b>Vc O395</b>                       | <b>Clasical, Ogawa or Inaba, Sm<sup>r</sup></b>                                          | <b>Laboratory collection</b>                      |
| <b>EcN</b>                           | <b><i>E. coli</i> Nissle 1917 human isolates, probiotic strain</b>                       | <b>Prof. Rudolf von Büнау, Ardeypharm</b>         |
| <b>Ec 40</b>                         | <b><i>E.coli</i> sample 40 human isolates, “A” phylotype</b>                             | <b>[13]</b>                                       |
| <b>MG1655<math>\Delta</math>ptsG</b> | <b><i>E. coli</i> K12, sugar transport mutant</b>                                        | <b>[13]</b>                                       |
| <b>Plasmids</b>                      | <b>Description</b>                                                                       | <b>Source/reference</b>                           |
| <b>pSMC 21</b>                       | <b>Amp<sup>r</sup> 100 <math>\mu</math>g/ml; Kan<sup>r</sup> 50 <math>\mu</math>g/ml</b> | <b>Dr. Roberto Kolter, Harvard Medical School</b> |
| <b>pKK177-3R1</b>                    | <b>Amp<sup>r</sup> 100 <math>\mu</math>g/ml</b>                                          | <b>[37]</b>                                       |
| <b>pBAD 18</b>                       | <b>Kan<sup>r</sup> 50<math>\mu</math>g/ml</b>                                            | <b>Laboratory collection</b>                      |

**Table S2: Gut pH of fish after *E. coli* inoculation with glucose**

| <b><i>E. coli</i> inoculation with glucose</b> | <b>0h</b> | <b>6h</b> | <b>12h</b> | <b>24h</b> | <b>48h</b> | <b>72h</b> |
|------------------------------------------------|-----------|-----------|------------|------------|------------|------------|
| <b>Ec 40 with single glucose feeding</b>       | <b>8</b>  | <b>8</b>  | <b>6.5</b> | <b>6</b>   | <b>8</b>   | <b>8</b>   |
| <b>Ec 40 with daily glucose feeding</b>        | <b>8</b>  | <b>8</b>  | <b>6.5</b> | <b>6.5</b> | <b>6</b>   | <b>6.5</b> |
